# Supplementary material for: Variability in S-Alk(en)yl-l-Cysteine Sulfoxides in Garlic within a Seven-Month Period Determined by a Liquid Chromatography – Tandem Mass Spectrometry Method
Source: Springer Nature journal article supplement (doi:10.1007/s11130-020-00817-z), 2020-05-12

**Variability in S-alk(en)yl-L-cysteine sulfoxides in garlic within a seven-month period determined by a liquid chromatography – tandem mass spectrometry method– Supplementary material**

*Plant Foods for Human Nutrition*

Michaela Rektorisova<sup>a</sup>, Vojtech Hrbek<sup>a</sup>, Monika Jiru<sup>a</sup>, Jaroslava Ovesna<sup>b</sup>, Jana Hajslova<sup>a\*</sup>

*a) University of Chemistry and Technology, Prague, Faculty of Food and Biochemical Technology,  
Department of Food Analysis and Nutrition, Technicka 3, 166 28 Prague 6, Czech Republic*

*b) Crop Research Institute, Prague, Drnovska 507/73, 161 06 Prague 6, Czech Republic*

<sup>\*)</sup> Corresponding author: E-mail address: [jana.hajslova@vscht.cz](mailto:jana.hajslova@vscht.cz), tel.: +420 220 443 185;

fax: +420 220 443 180, ORCID iD 0000-0001-7443-4280

### **Agricultural practices used for garlic at all localities**

Only healthy cloves, treated with 5% Sulka (Agrobio Oprava, Czech Republic) against *Aceria tulipae* and fungi, have been planted in three-row plots, in fields after NPK fertilization. Herbicide pendimethalin (Stomp SC, BASF, Germany, 1600 g/ha) was applied after planting and repeatedly during vegetation period; in addition to hand weeding. In the spring, plants were sprayed with a mixture of insecticides cypermethrin (30 mg/ha) and chlorpyrifos (300 mg/ha) (Nurelle D, Agrobio Oprava, Czech Republic) and lambda-cyhalothrin (50 g/ha, Markate 50, Sumi Agro Czech, Czech Republic) twice. As fungicide, azoxystrobin was used (250 g/ha, Ortiva, Agrobio Opava, Czech Republic, and then twice, in 14-day interval, Amistar, 150 g/ha, Syngenta Supply AG, Switzerland). In addition, root boosters were applied. During vegetation period, garlic scapes had been pinched when appeared. Nitrogen fertilization was applied according to standard practices. After machine harvest, soil was brushed away and bulbs with roots and shoots still attached were allowed to dry under ambient conditions (20 °C, suitable air circulation) for two weeks, and then stored at 4 °C.

**Table S1** Target compounds analyzed in positive electrospray mode

| Compound          | Elemental formula                                | Ion type           | MRM quantitative transition m/z | MRM qualitative transition m/z | Retention time (min) |
|-------------------|--------------------------------------------------|--------------------|---------------------------------|--------------------------------|----------------------|
| Methiin           | C <sub>4</sub> H <sub>9</sub> NO <sub>3</sub> S  | [M+H] <sup>+</sup> | 152 > 88                        | 152 > 88                       | 4.58                 |
| Isoalliin         | C <sub>6</sub> H <sub>11</sub> NO <sub>3</sub> S | [M+H] <sup>+</sup> | 178 > 88                        | 178 > 74                       | 4.23                 |
| Ethiin            | C <sub>5</sub> H <sub>11</sub> NO <sub>3</sub> S | [M+H] <sup>+</sup> | 166 > 88                        | 166 > 88                       | 4.12                 |
| Alliin            | C <sub>6</sub> H <sub>11</sub> NO <sub>3</sub> S | [M+H] <sup>+</sup> | 178 > 88                        | 178 > 74                       | 3.54                 |
| Propiin           | C <sub>6</sub> H <sub>13</sub> NO <sub>3</sub> S | [M+H] <sup>+</sup> | 180 > 88                        | 180 > 70                       | 3.42                 |
| Butiin            | C <sub>7</sub> H <sub>15</sub> NO <sub>3</sub> S | [M+H] <sup>+</sup> | 194 > 88                        | 194 > 88                       | 2.88                 |
| Norleucine (ISTD) | C <sub>6</sub> H <sub>13</sub> NO <sub>2</sub>   | [M+H] <sup>+</sup> | 132 > 86                        | 132 > 69                       | 1.40                 |

ISTD - internal standard; MRM - multiple reaction monitoring

**Table S2** Linearity response ranges and limits of detection (LOD) of target S-alk(en)yl-L-cysteine sulfoxides (ACSOs).

|           | LOD (µg/ml) | LOD (g/kg garlic) | Linear range (µg/ml) | R <sup>2</sup> |
|-----------|-------------|-------------------|----------------------|----------------|
| Methiin   | 0.015       | 2.3               | 0.1-20               | 0.9925         |
| Isoalliin | 0.100       | 15.5              | 0.1-10               | 0.9972         |
| Ethiin    | 0.050       | 7.8               | 0.1-10               | 0.9992         |
| Alliin    | 0.100       | 15.5              | 0.1-20               | 0.9968         |
| Propiin   | 0.010       | 1.6               | 0.02-20              | 0.9976         |
| Butiin    | 0.020       | 3.1               | 0.1-20               | 0.9980         |

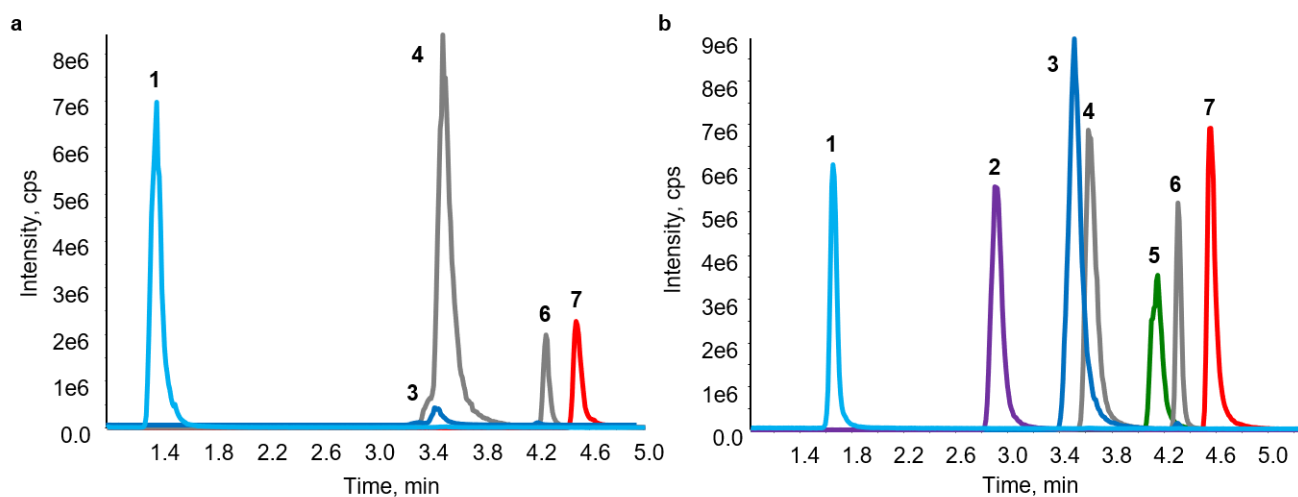

**Fig. S1** LC-MS/MS chromatograms of: a - garlic extract; b – standard mixture 20 µg/ml. 1 – norleucin (ISTD); 2 – butiin; 3 - propiin; 4 – alliin, 5 – ethiin, 6 – isoalliin, 7 - methiin

**Table S3** List of analyzed garlic samples with determined dry weight and S-alk(en)yl-L-cysteine sulfoxide (ACSO) content

| Sampling     | Sampling date | Cultivar  | Locality    | Dry weight (%) | ACSOs            |                    |                   |                   |
|--------------|---------------|-----------|-------------|----------------|------------------|--------------------|-------------------|-------------------|
|              |               |           |             |                | Aliiin (g/kg dw) | Isoaliin (g/kg dw) | Methiin (g/kg dw) | Propiin (g/kg dw) |
| Sampling I   | 29.06.2016    | Havran    | Boritov     | 30.94          | 44.21            | 1.53               | 11.59             | 1.32              |
| Sampling II  | 26.07.2016    | Havran    | Boritov     | 36.55          | 27.87            | 1.12               | 7.70              | 0.94              |
| Sampling III | 02.10.2016    | Havran    | Boritov     | 34.60          | 27.83            | 3.00               | 7.71              | 0.99              |
| Sampling I   | 30.06.2016    | Unikat    | Boritov     | 32.87          | 38.06            | 0.98               | 7.65              | 1.22              |
| Sampling II  | 26.07.2016    | Unikat    | Boritov     | 37.63          | 24.07            | 1.44               | 6.72              | 0.77              |
| Sampling III | 02.10.2016    | Unikat    | Boritov     | 36.60          | 23.40            | 3.16               | 5.25              | 0.80              |
| Sampling IV  | 29.01.2017    | Unikat    | Boritov     | 36.85          | 28.41            | 11.84              | 7.03              | 2.01              |
| Sampling I   | 30.06.2016    | Vinar     | Boritov     | 34.01          | 40.26            | 0.18               | 11.45             | 0.50              |
| Sampling II  | 26.07.2016    | Vinar     | Boritov     | 38.28          | 26.24            | 1.23               | 9.67              | 0.88              |
| Sampling III | 02.10.2016    | Vinar     | Boritov     | 36.44          | 27.97            | 2.61               | 7.19              | 0.92              |
| Sampling IV  | 29.01.2017    | Vinar     | Boritov     | 38.29          | 24.11            | 13.70              | 5.73              | 1.54              |
| Sampling I   | 27.06.2016    | Germidour | Bratkovice  | 35.89          | 22.81            | 0.64               | 2.04              | 0.71              |
| Sampling I   | 27.06.2016    | Theador   | Bratkovice  | 32.65          | 23.12            | 0.72               | 2.53              | 0.69              |
| Sampling II  | 10.08.2016    | Bjetin    | Doksy       | 35.79          | 27.29            | 1.67               | 4.58              | 0.70              |
| Sampling II  | 10.08.2016    | Havran    | Doksy       | 37.15          | 24.34            | 1.17               | 6.97              | 0.54              |
| Sampling II  | 10.08.2016    | Rusak     | Doksy       | 39.64          | 27.49            | 2.12               | 5.01              | 0.54              |
| Sampling II  | 10.08.2016    | Rusak*    | Doksy       | 40.94          | 32.58            | 3.35               | 6.39              | 0.73              |
| Sampling II  | 10.08.2016    | Tantal    | Doksy       | 35.19          | 24.64            | 2.50               | 1.37              | 0.67              |
| Sampling II  | 10.08.2016    | Unikat    | Doksy       | 41.38          | 25.01            | 1.89               | 3.00              | 0.62              |
| Sampling II  | 01.08.2016    | Dukat     | Olbramovice | 41.27          | 13.05            | 2.09               | 4.69              | 0.43              |
| Sampling I   | 19.06.2016    | Lukan     | Olbramovice | 39.14          | 16.21            | 0.45               | 1.97              | 0.57              |
| Sampling II  | 01.08.2016    | Lukan     | Olbramovice | 39.36          | 13.73            | 2.01               | 2.51              | 0.44              |
| Sampling III | 02.10.2016    | Lukan     | Olbramovice | 36.86          | 13.26            | 2.19               | 1.17              | 0.50              |
| Sampling IV  | 29.01.2017    | Lukan     | Olbramovice | 34.17          | 15.42            | 8.48               | 2.16              | 0.98              |
| Sampling I   | 19.06.2016    | Tantal    | Olbramovice | 32.87          | 18.41            | 0.39               | 0.79              | 0.58              |
| Sampling II  | 01.08.2016    | Tantal    | Olbramovice | 38.49          | 15.85            | 1.67               | 1.05              | 0.51              |
| Sampling III | 02.10.2016    | Tantal    | Olbramovice | 41.17          | 15.09            | 3.49               | 1.83              | 0.61              |
| Sampling I   | 19.06.2016    | Unikat    | Olbramovice | 37.62          | 14.43            | 0.31               | 2.60              | 0.56              |
| Sampling II  | 01.08.2016    | Unikat    | Olbramovice | 39.05          | 12.93            | 1.00               | 1.91              | 0.43              |
| Sampling III | 02.10.2016    | Unikat    | Olbramovice | 38.24          | 16.62            | 3.18               | 3.44              | 0.66              |
| Sampling IV  | 29.01.2017    | Unikat    | Olbramovice | 37.03          | 11.74            | 9.92               | 2.25              | 0.85              |
| Sampling I   | 19.06.2016    | Vekan     | Olbramovice | 37.63          | 10.97            | 0.17               | 2.41              | 0.43              |
| Sampling II  | 01.08.2016    | Vekan     | Olbramovice | 39.32          | 15.02            | 1.89               | 3.32              | 0.46              |
| Sampling III | 02.10.2016    | Vekan     | Olbramovice | 38.27          | 12.58            | 3.53               | 3.68              | 0.50              |
| Sampling I   | 27.06.2016    | Dukat     | Slapanice   | 33.01          | 35.45            | 1.37               | 7.15              | 1.09              |
| Sampling II  | 07.08.2016    | Dukat     | Slapanice   | 41.61          | 21.76            | 1.03               | 4.60              | 0.74              |
| Sampling III | 03.10.2016    | Dukat     | Slapanice   | 39.86          | 18.99            | 2.65               | 4.24              | 0.82              |

| Sampling     | Sampling date | Cultivar    | Locality, postal code | Dry weight (%) | Aliin (g/kg dw) | Isoaliin (g/kg dw) | Methiin (g/kg dw) | Propiin (g/kg dw) |
|--------------|---------------|-------------|-----------------------|----------------|-----------------|--------------------|-------------------|-------------------|
| Sampling I   | 27.06.2016    | Rusak       | Slapanice             | 38.48          | 29.24           | 1.07               | 5.60              | 0.91              |
| Sampling II  | 07.08.2016    | Rusak       | Slapanice             | 40.60          | 18.81           | 0.82               | 4.18              | 0.60              |
| Sampling III | 03.10.2016    | Rusak       | Slapanice             | 39.81          | 15.78           | 1.60               | 2.73              | 0.62              |
| Sampling IV  | 29.01.2017    | Rusak       | Slapanice             | 38.28          | 22.00           | 11.27              | 3.79              | 1.47              |
| Sampling I   | 27.06.2016    | Unikat      | Slapanice             | 34.36          | 36.14           | 1.19               | 5.95              | 1.25              |
| Sampling II  | 07.08.2016    | Unikat      | Slapanice             | 38.07          | 22.41           | 1.34               | 5.12              | 0.76              |
| Sampling III | 03.10.2016    | Unikat      | Slapanice             | 37.65          | 15.89           | 2.26               | 3.89              | 0.70              |
| Sampling IV  | 29.01.2017    | Unikat      | Slapanice             | 35.89          | 20.01           | 10.94              | 4.56              | 1.28              |
| Sampling I   | 27.06.2016    | Vinar       | Slapanice             | 34.33          | 25.43           | 1.43               | 6.25              | 0.79              |
| Sampling II  | 07.08.2016    | Vinar       | Slapanice             | 39.33          | 22.30           | 0.92               | 6.60              | 0.69              |
| Sampling III | 03.10.2016    | Vinar       | Slapanice             | 38.60          | 19.29           | 1.93               | 4.37              | 0.75              |
| Sampling II  | 25.07.2016    | Eden rose   | Vitov                 | 35.64          | 19.08           | 0.77               | 2.83              | 0.65              |
| Sampling II  | 25.07.2016    | Fhermidrome | Vitov                 | 35.86          | 13.85           | 0.19               | 0.94              | 0.46              |
| Sampling II  | 25.07.2016    | Germidour   | Vitov                 | 37.70          | 14.17           | 0.31               | 0.44              | 0.43              |
| Sampling II  | 25.07.2016    | Goulurose   | Vitov                 | 33.49          | 20.71           | 1.91               | 3.93              | 0.64              |
| Sampling II  | 25.07.2016    | Theador     | Vitov                 | 33.71          | 16.48           | 0.31               | 0.90              | 0.55              |
| Sampling IV  | 29.01.2017    | Theador     | Vitov                 | 35.93          | 9.18            | 2.32               | 0.45              | 0.56              |

In gray: Sample subset, involving four cultivars from three growing localities present in all samplings

\*original Rusak, of which Dukat and Unikat were bred

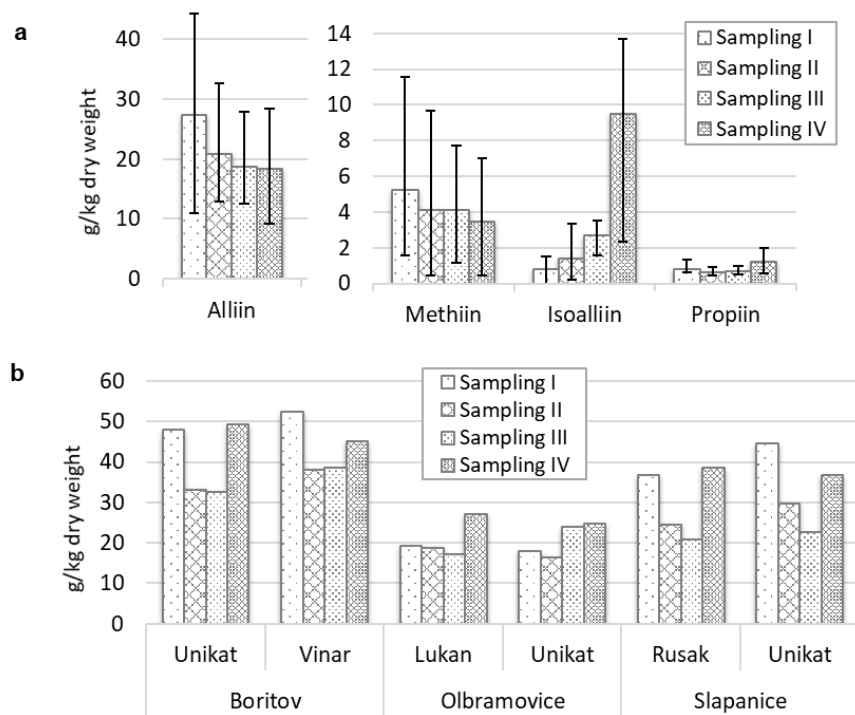

**Fig. S2** Changes in S-alk(en)yl-L-cysteine sulfoxide (ACSO) content in garlic samples over the sampling period  
a – Average content of ACSOs in all samplings, error bars represent maximum and minimum determined values and show a high natural variability between samples of different cultivar and growing locality;

b – Total content of ACSOs in sample subset over the sampling period. Notice a different pattern for samples of same cultivar grown at different localities (Unikat)

*Sampling I* - bulbs harvested one month before achieving harvest maturity (in late June); *Sampling II* - bulbs harvested mature and then dried under ambient conditions for two weeks (July/August); *Sampling III* - bulbs from *Sampling II* stored for two months at 4 °C (early October); and *Sampling IV* - bulbs from *Sampling II* stored for six months at 4 °C (end of January)

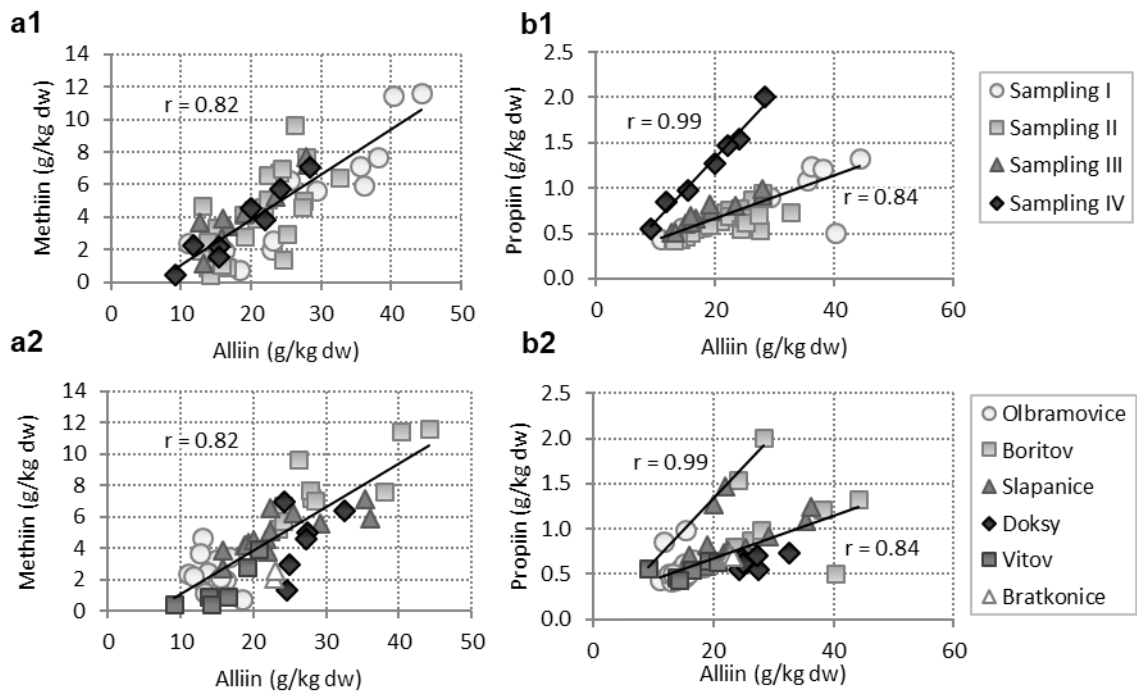

**Fig. S3** Correlation between the determined content of individual S-alk(en)yl-L-cysteine sulfoxides (ACSOs) in all garlic samples

a – Alliin and methiin, linear regression for all samples;

b – Alliin and propiin, linear regression for Sampling IV (after storage at 4 °C for six months) separated from Sampling I-III (one month before harvest maturity/two weeks after harvest/after two-month storage);

1 - Coloured by samplings;

2 - Coloured by localities

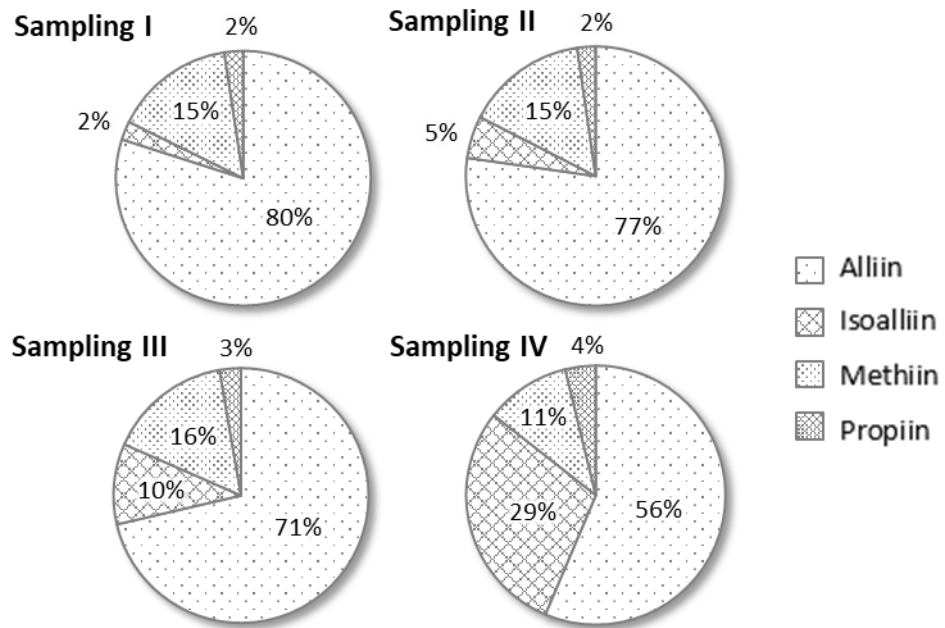

**Fig. S4** Relative composition (pattern) of the S-alk(en)yl-L-cysteine sulfoxides (ACSOs) in each sampling, mean values of all samples

*Sampling I* – bulbs harvested one month before achieving harvest maturity (in late June);

*Sampling II* – bulbs harvested mature and then dried under ambient conditions for two weeks (July/August);

*Sampling III* – bulbs from *Sampling II* stored for two months at 4 °C (early October); and

*Sampling IV* – bulbs from *Sampling II* stored for six months at 4 °C (end of January)



**Table S4** Compounds to be included to the LC-MS/MS method.

| Compound                                                     | Abbreviation          | Ion type           | MRM* quantitative transition m/z | MRM* qualitative transition m/z |
|--------------------------------------------------------------|-----------------------|--------------------|----------------------------------|---------------------------------|
| $\gamma$ -L-glutamyl-S-methyl-L-cysteine sulfoxide           | $\gamma$ -GluMethiin  | [M+H] <sup>+</sup> | 281 > 216                        | 281 > 129                       |
| $\gamma$ -L-glutamyl-S-allyl-L-cysteine sulfoxide            | $\gamma$ -GluAlliin   | [M+H] <sup>+</sup> | 307 > 217                        | 307 > 129                       |
| $\gamma$ -L-glutamyl-S-(prop-1-en-1-yl)-L-cysteine sulfoxide | $\gamma$ -GluSoalliin | [M+H] <sup>+</sup> | 307 > 217                        | 307 > 129                       |
| $\gamma$ -L-glutamyl-S-propyl-L-cysteine sulfoxide           | $\gamma$ -GluPropiin  | [M+H] <sup>+</sup> | 309 > 216                        | 309 > 129                       |
| $\gamma$ -L-glutamyl-S-methyl-L-cysteine                     | $\gamma$ -GMCys       | [M+H] <sup>+</sup> | 265 > 119                        | 265 > 135                       |
| $\gamma$ -L-glutamyl-S-allyl-L-cysteine                      | $\gamma$ -GACys       | [M+H] <sup>+</sup> | 291 > 144                        | 291 > 72                        |
| $\gamma$ -L-glutamyl-S-propyl-L-cysteine                     | $\gamma$ -GPCys       | [M+H] <sup>+</sup> | 293 > 146                        | 293 > 163                       |
| $\gamma$ -L-glutamyl-S-(prop-1-en-1-yl)-L-cysteine           | $\gamma$ -G-1-PeCys   | [M+H] <sup>+</sup> | 291 > 84                         | 291 > 161                       |

\*Multiple reaction monitoring

**Figure S5** Chromatograms of  $\gamma$ -L-glutamyl peptides and their sulfoxides. For abbreviations, see Table S4.

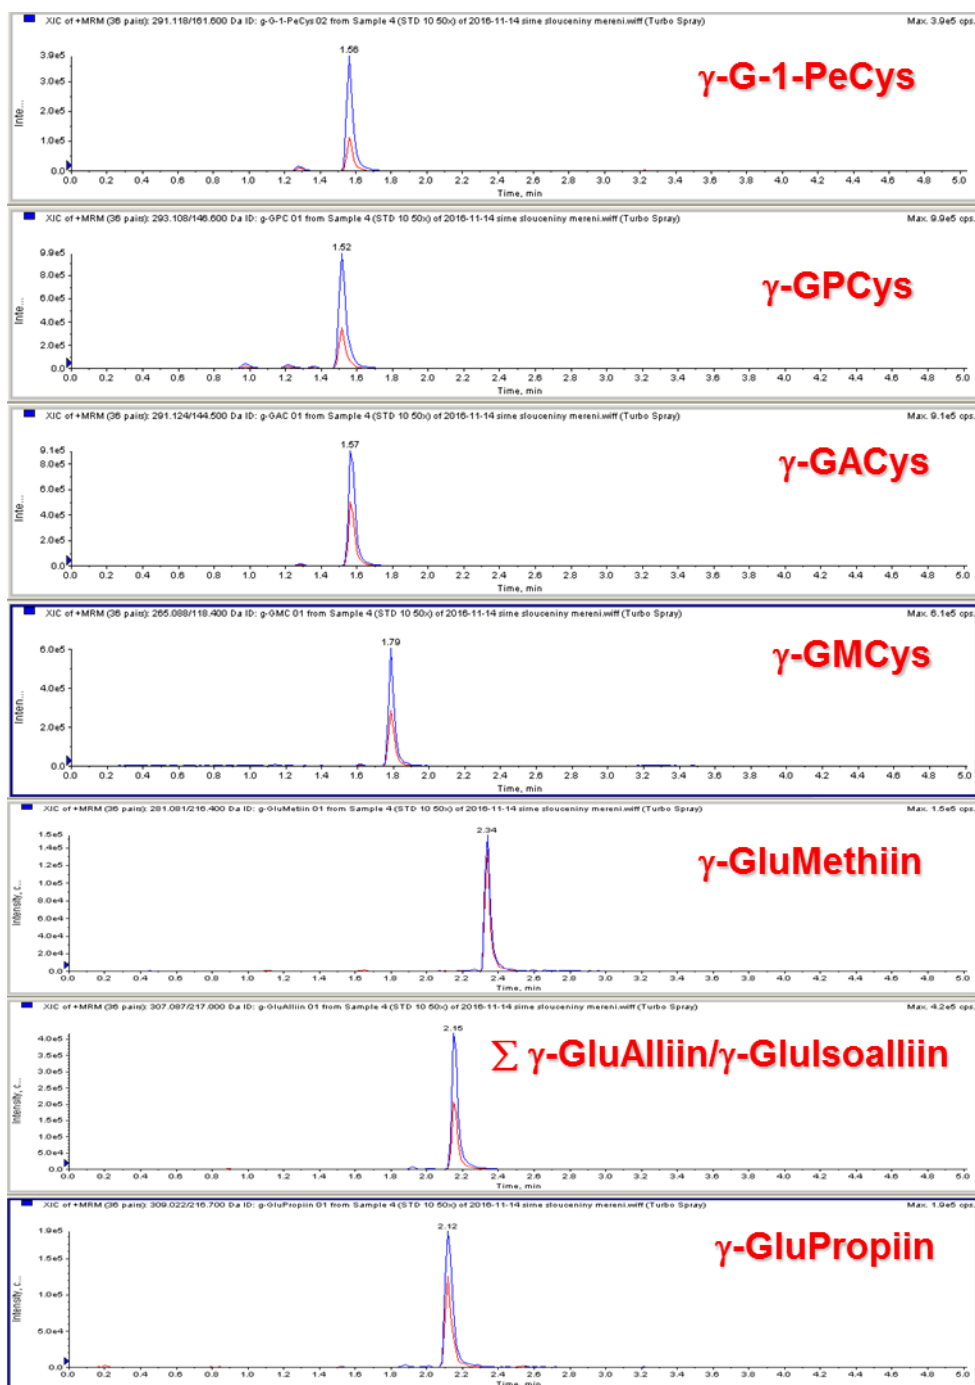

Supplement: 11130_2020_817_MOESM1_ESM.pdf [file 11130_2020_817_MOESM1_ESM.pdf]
